# Supplementary material for: Murine Gammaretrovirus Group G3 Was Not Found in Swedish Patients with Myalgic Encephalomyelitis/Chronic Fatigue Syndrome and Fibromyalgia
Source: PLoS One. 2011 Oct 12;6(10):e24602. doi: 10.1371/journal.pone.0024602 (PMC3192035; doi:10.1371/journal.pone.0024602)
Supplement: Information S4 — Development of the gag and env RTQPCR; Evolutionary conservation of target sequences. (PDF) [file pone.0024602.s005.pdf]

# Supplemental information S5

## Design of two RTQPCRs for XMRV like murine leukemia viruses

### Identification of conserved portions of MLV-like retroviral genomes using the ConSort<sup>®</sup> program

The variation in MLV *gag* genes was studied by blasting the nr portion of GenBank with *gag* of XMRV VP62. BLASTN retrieved 109 MLV *gag* sequences. The result was treated with the variation analysis program ConSort (Blomberg et al, unpublished) (fig S1 A and B). The selected portion of *gag* corresponded approximately to the major homology region of Gag.

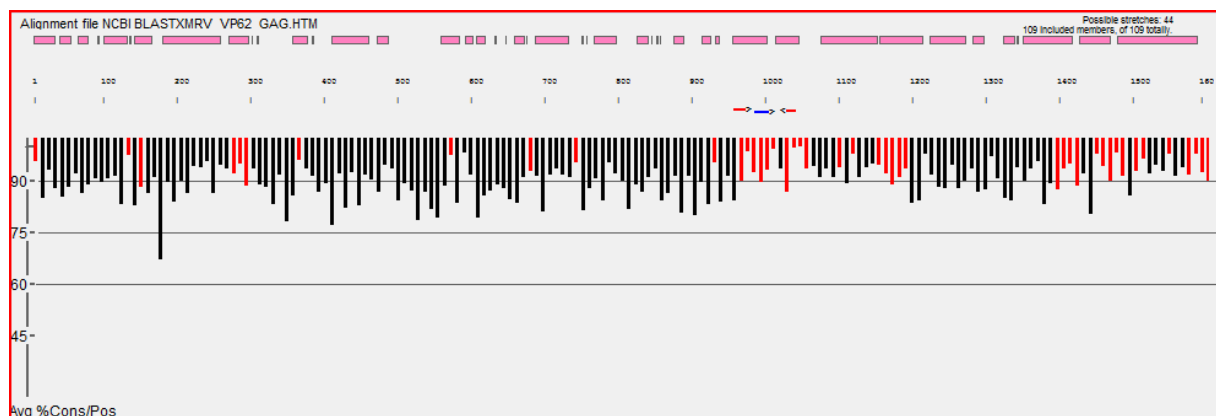

**Figure S5 A.** ConSort representation of variation in the entirety of MLV-like *gag* sequences. The selected *gag* primers and probe are shown above the variation histogram. Red bars indicate sequence portions containing at least one invariant nucleotide position.

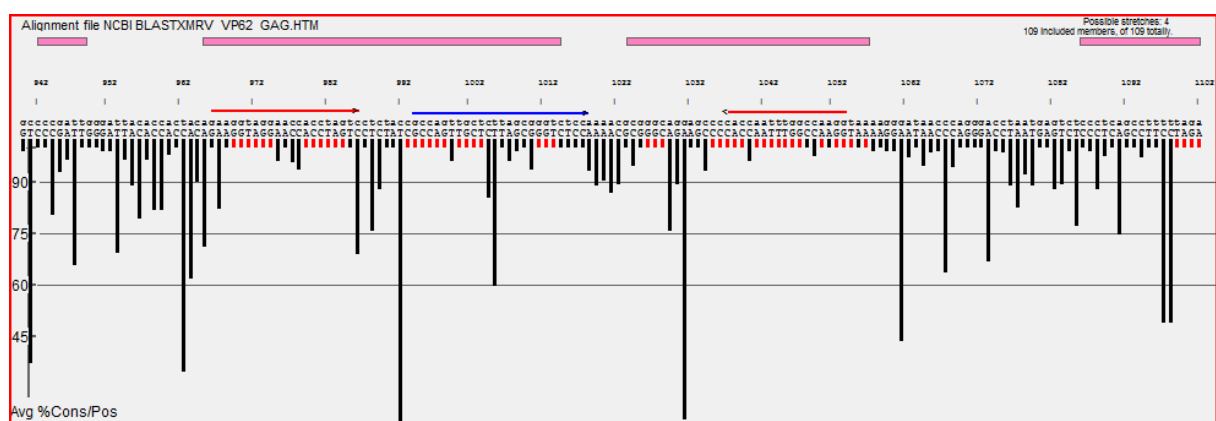

**Figure S5. B.** A close-up view of the ConSort representation of the *gag* portion selected for primer and probe construction. ConSort of entire MLV-like *gag* sequences. The mauve rectangles at the top indicate regions suggested as primer or probe targets by ConSort.

The selected primers and probe were tested in a QRT-PCR against the XMRV VP62 plasmid kindly provided by prof Robert Silverman. Sensitivities of 1-10 copies per PCR reaction were obtained (Figure S5 C and D).

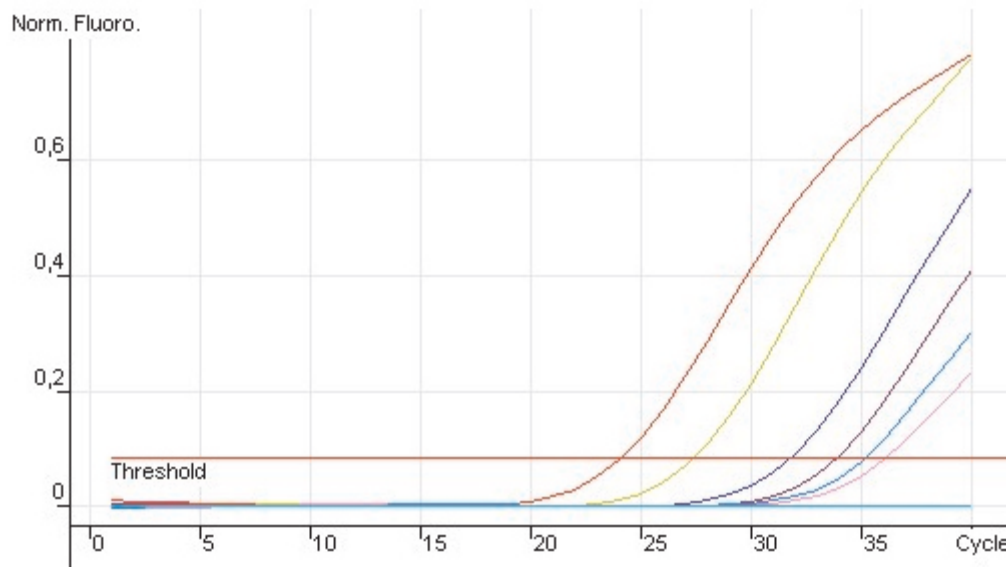

**Figure S5. C. Real time amplification from a dilution series of VP62 plasmid DNA.**

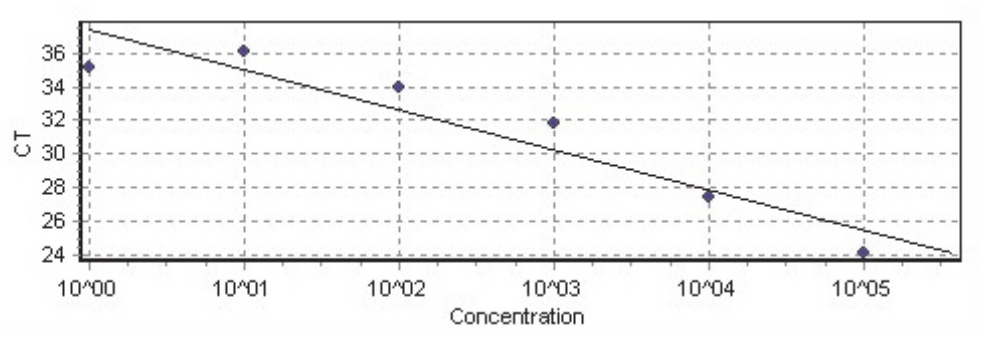

**Figure S5. D. Plot of number of copies per PCR reaction versus Ct value, same experiment as above.**

Similarly, variation in the MLV *env* gene was studied by retrieving sequences similar to XMRV VP62 *env* with BLASTN of the nr portion of GenBank. The primers and probe in the XMRV envelope gene (ConSort) were based on 484 MLV *env* sequences (Fig S5 E, F and G).

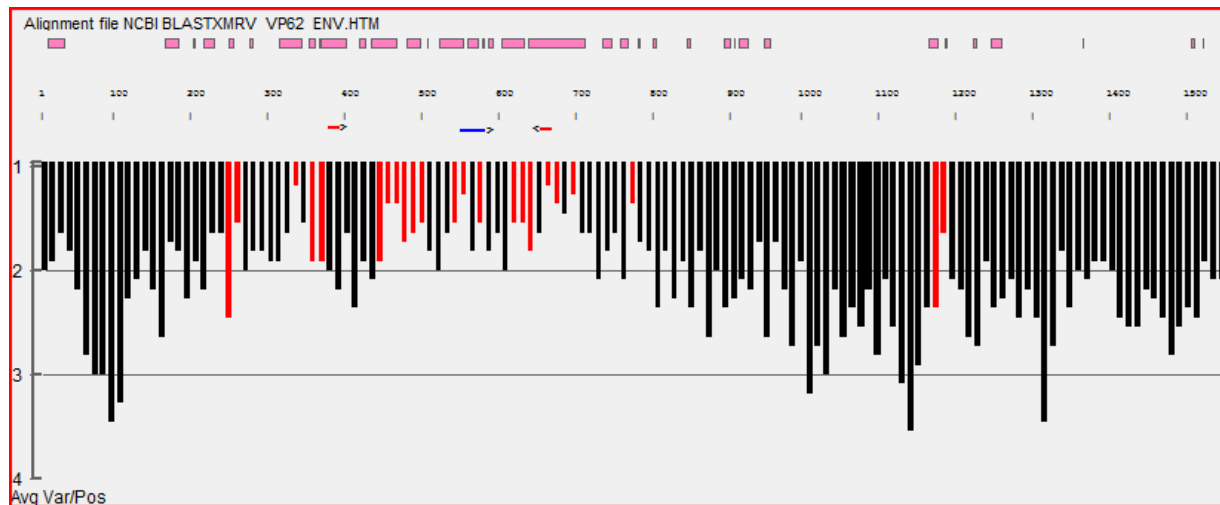

**Figure S5. E.** ConSert representation of variation in the entirety of MLV-like *env* sequences. The selected *env* primers and probe are shown above the variation histogram. Other conventions are as in figure S5A.

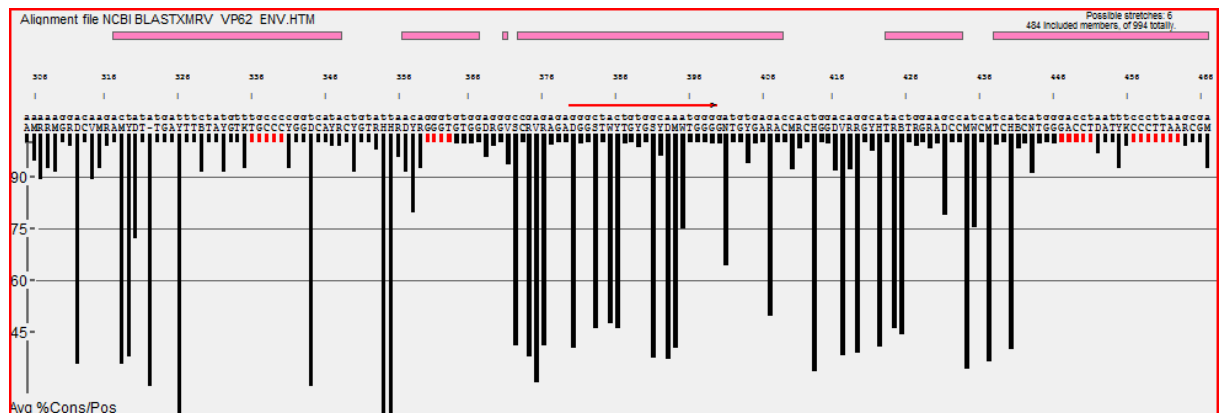

**Figure S5. F.** A close-up view of the variation in the target area for the forward primer. Conventions are as in figure S5A.

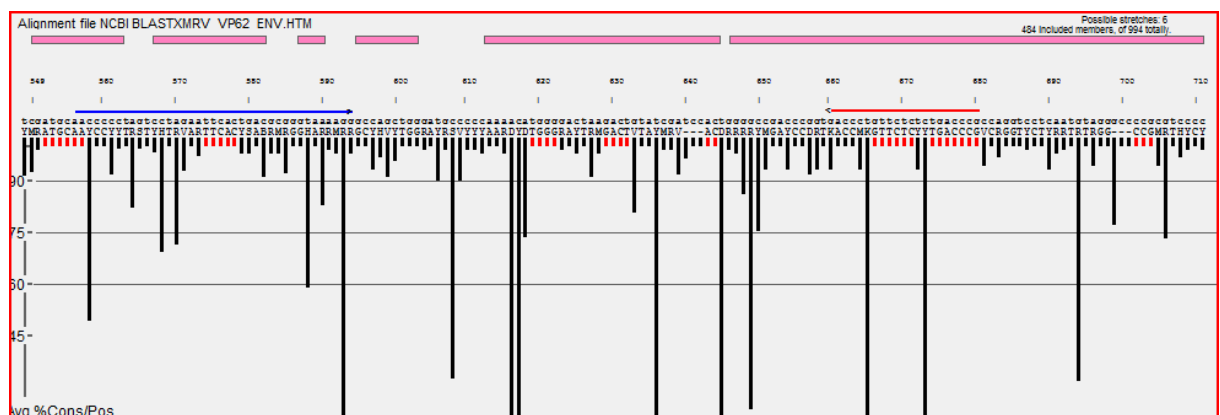

**Figure S5. G.** A close-up view of the variation in the target area for the probe and the reverse primer. Conventions are as in figure S1.

In an attempt to study the variation of a restricted set of target sequences, most highly similar to XMRV, the BLASTN hits were restricted to those with score >1000, and coming from a Xenotropic or a Polytopic MLV (60 hits) (Figure S5 H, I and J).

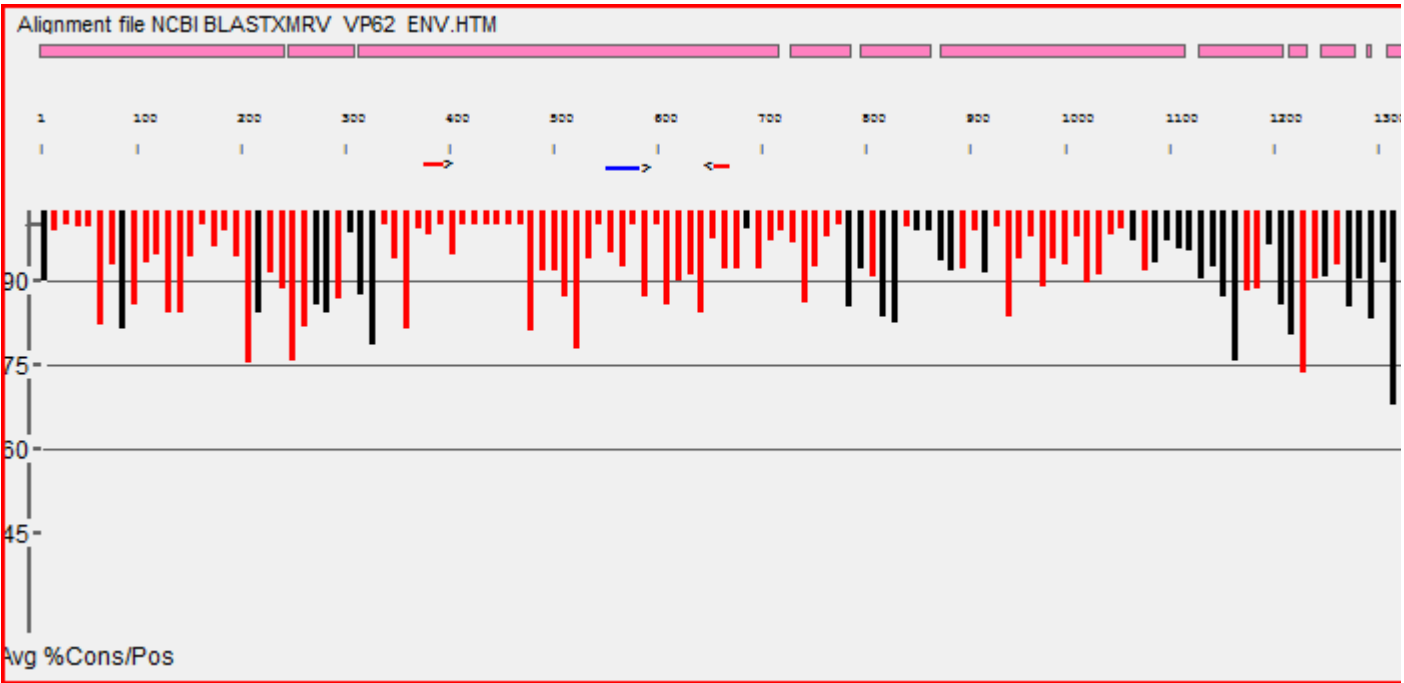

**Figure S5. H.** ConSert representation of variation in a restricted set of highly XMRV-related sequences. The variation is smaller than in the set depicted in Figure S5 C.

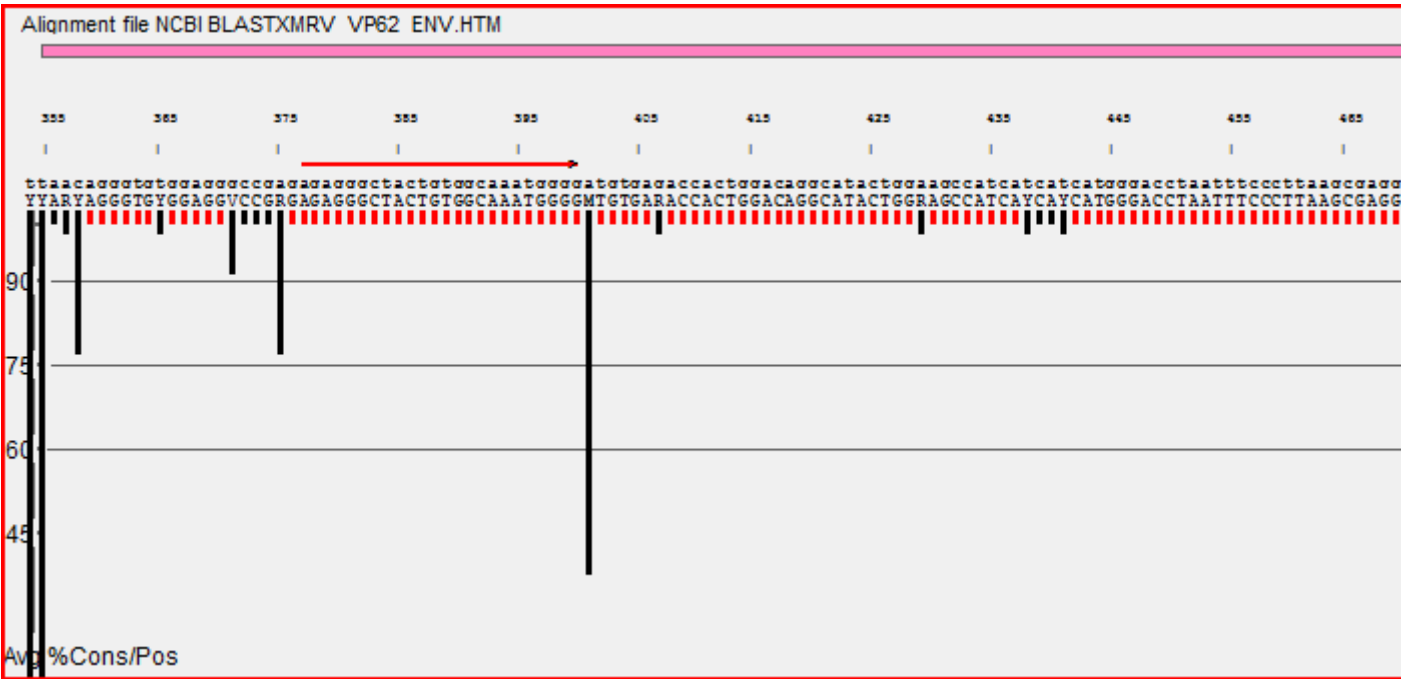

**Figure S5. I.** Close -up of the target region for the forward primer, in a restricted set of highly XMRV - related sequences.

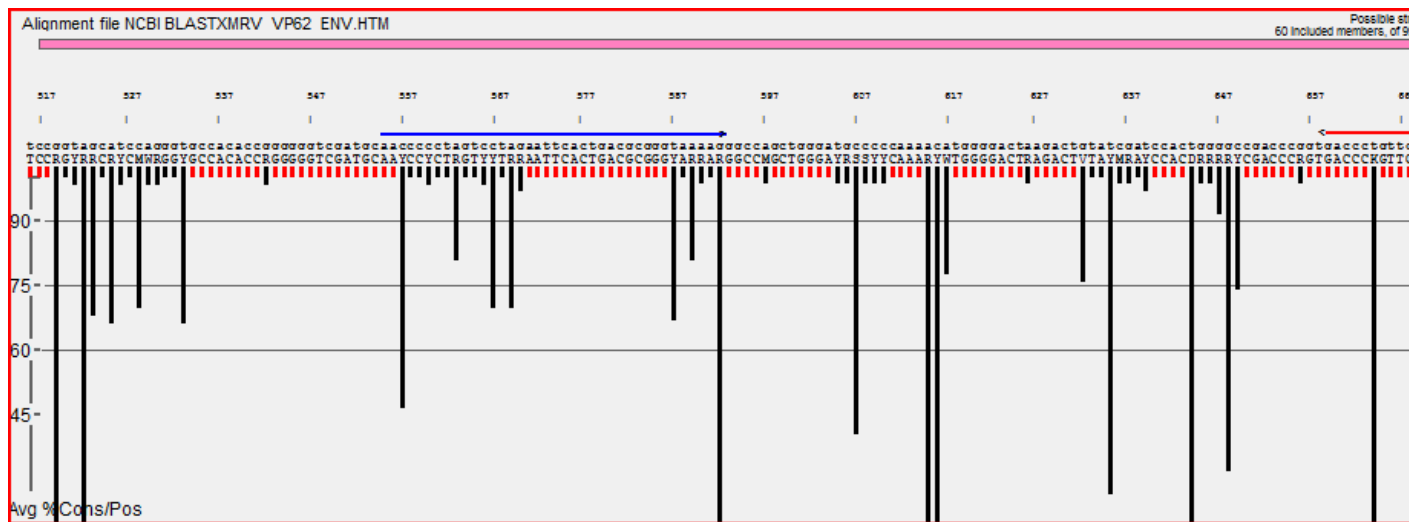

**Figure S5. J.** Close -up of the target region for the probe and reverse primer, in a restricted set of highly XMRV-related sequences.

The probe was constructed according to the MegaBeacon principle (Muradrasoli et al, 2009). This allows a greater variation tolerance than ordinary nuclease-activated probes. Probes of greater length can tolerate more mismatches than probes of shorter length. The chosen MegaBeacon probe had a length of 49 nucleotides, of which 39 were target specific. More details regarding the properties of MegaBeacon probes are given in (Muradrasoli et al, 2010; see reference in the main paper).

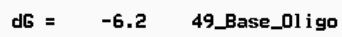

**Figure S5 K.** The MegaBeacon probe for XMRV *env*. The figure was obtained from the M. Zuker MFOLD home page at Washington University.
