# Supplementary material for: Murine Gammaretrovirus Group G3 Was Not Found in Swedish Patients with Myalgic Encephalomyelitis/Chronic Fatigue Syndrome and Fibromyalgia
Source: PubMed Central journal article supplement (PMC3192035; doi:10.1371/journal.pone.0024602), 2011-10-12
Supplement: pone.0024602.s001.pdf [file pone.0024602.s001.pdf]

## Table S4. The 300 murine proviruses of groups G1-G3.

The most intact proviruses were selected from the *Mus musculus* (C57Black/6J) genome assembly mm8 portion of a RetroBank prototype by selecting for a RetroTector score of 2000 (essentially complete proviruses, with no or a few frameshifts or stops) and genus gammaretrovirus (estimated by RetroTector). 306 proviruses fulfilled these criteria. Of them, six were duplicates. RetroTector may produce duplicates when alternative proviral interpretations occur. The lowest scoring of each duplicate was removed, giving 300 proviruses. Three major branches were evident in all phylogenies. They were named G1, G2 and G3 (for gamma 1, gamma 2 and gamma 3). Some of their properties are listed below. Although some exogenous gammaretroviruses cluster with the groups (2-3 rat endogenous proviruses cluster with G2 and many ecotropic exogenous MLVs cluster with G3), only endogenous proviruses from assembly mm8 are shown below. The envelopes of a few G1 and G2 proviruses cluster differently from the rest of those proviruses, probably due to recombination. The subject cannot be treated extensively here.

The columns are:

1. Group: The allocation of groups G1-G3, based on *gag* and *pol* Clustal alignments and phylogenetic trees based on them.
2. Jern subgroups. These are from Jern et al, Plos Genetics 2007. We used BLAT at the UCSC site to search the most highly similar sequence in the mm8 assembly. Not all G3 proviruses could be given a Jern subgroup assignment, for unknown reasons. Several of the concatenated *gag/pro/pol/env* sequences were not sufficiently different from each other, and yielded ambiguous calls. This uncertainty is reflected in the column.
3. THIS, the G3 subgroup inferred from the clustering in *gag*, *pol* and *env* based trees in this paper.
4. Chromosome in mm8.
5. Chainstart, the start position of the provirus. The 5' end is always given as the start.
6. Chainend, the end position of the provirus. The 3' end is always given as the end.
7. Sense, which can be the primary (P) or secondary (S) strand. The primary strand is the one used for numbering the chromosome in question.
8. Score, the score calculated by RetroTector<sup>©</sup>. It is a rough representation of proviral completeness.
9. Genus, in this case always C (gammaretrovirus-like).
10. GagOrf, the sum of frameshifts and stops in the *gag* gene. -1 means that the *gag* gene could not be interpreted.
11. ProOrf, annotated in the same way as GagOrf.
12. PolOrf, annotated in the same way as GagOrf.
13. EnvOrf, annotated in the same way as GagOrf.
14. Estimated PBS. Upper case means "good fit to a PBS sequence", lower case means "moderate fit to a PBS sequence". All PBS entries were checked against the tRNAdb in Leipzig.
15. The PBS sequence.
16. LTRdivergence, the % divergence between the two LTRs, a rough measure of time since integration.







|    |           |      |    |           |           |   |      |   |    |   |   |    |   |                     |        |
|----|-----------|------|----|-----------|-----------|---|------|---|----|---|---|----|---|---------------------|--------|
| G3 |           | MPMV | 8  | 126052021 | 126060437 | P | 2473 | C | 0  | 0 | 2 | 12 |   |                     |        |
| G3 |           | MPMV | 11 | 60402203  | 60394839  | S | 2265 | C | 1  | 0 | 2 | -1 | Q | tggagggtcccaccgagat | 0      |
| G3 |           | MPMV | 10 | 22424071  | 22432738  | P | 2929 | C | 0  | 0 | 0 | 0  | Q | tggagggtcccaccgagat | 0      |
| G3 | MPMV7     | MPMV | 5  | 43496527  | 43505213  | P | 2960 | C | 0  | 0 | 0 | 0  | Q | tggagggtcccaccgagat | 0      |
| G3 |           | MPMV | 6  | 73223771  | 73213956  | S | 2547 | C | 0  | 0 | 2 | -1 |   |                     | 43,519 |
| G3 | MPMV6     | MPMV | 1  | 133470452 | 133479146 | P | 2862 | C | 1  | 0 | 0 | 0  | Q | tggagggtcccaccgagat | 0      |
| G3 |           | MPMV | 5  | 110148316 | 110140851 | S | 2459 | C | 1  | 0 | 2 | -1 | Q | tggagggtcccaccgagat | 0      |
| G3 | MPMV8     | MPMV | 11 | 102900091 | 102908778 | P | 2865 | C | 1  | 0 | 1 | 0  | Q | tggagggtcccaccgagat | 0      |
| G3 | MPMV4     | MPMV | 11 | 86698849  | 86707535  | P | 2944 | C | 0  | 0 | 0 | 0  | Q | tggagggtcccaccgagat | 0      |
| G3 | MPMV1     | MPMV | 7  | 64005512  | 64014552  | P | 2947 | C | 0  | 0 | 0 | 0  | T | tggagggtcccaccgagat | 0      |
| G3 | MPMV11    | MPMV | 12 | 70465730  | 70474228  | P | 3000 | C | 1  | 0 | 0 | 0  |   |                     | 0      |
| G3 |           | MPMV | 5  | 122453776 | 122460838 | P | 2230 | C | 2  | 0 | 3 | -1 | Q | tggagggtcccaccgagat | 1,357  |
| G3 | MPMV5     | MPMV | 10 | 4628507   | 4620011   | S | 2728 | C | 1  | 0 | 3 | 2  | Q | tggagggtcccaccgagat | 0      |
| G3 | XMV18     | XMV  | 19 | 60988354  | 60980003  | S | 2906 | C | 0  | 0 | 0 | 0  | Q | tggagggtcccaccgagat | 0      |
| G3 | XMV15     | XMV  | 9  | 62237522  | 62245905  | P | 2929 | C | 0  | 0 | 0 | 0  | Q | tggagggtcccaccgagat | 0      |
| G3 | XMV12?    | XMV  | 8  | 44818939  | 44810580  | S | 2936 | C | 0  | 0 | 0 | 0  | Q | tggagggtcccaccgagat | 0      |
| G3 | XMV19     | XMV  | 14 | 53484913  | 53492360  | P | 2707 | C | 3  | 0 | 0 | 0  | Q | tggagggtcccaccgagat | 0      |
| G3 | XMV9      | XMV  | 4  | 146062965 | 146071316 | P | 3063 | C | 0  | 0 | 0 | 0  | Q | tggagggtcccaccgagat | 0      |
| G3 | XMV13     | XMV  | 13 | 68392368  | 68384024  | S | 2914 | C | 0  | 0 | 0 | 0  | Q | tggagggtcccaccgagat | 0      |
| G3 | XMV16     | XMV  | 9  | 41663510  | 41656480  | S | 2282 | C | 10 | 0 | 0 | 0  |   |                     | 0      |
| G3 | XMV8      | XMV  | 4  | 145371516 | 145363002 | S | 2924 | C | 0  | 0 | 0 | 0  | Q | tggagggtcccaccgagat | 0      |
| G3 | XMV41     | XMV  | 1  | 173317855 | 173326267 | P | 2985 | C | 0  | 0 | 2 | 0  | P | tgggggtctgtccggat   | 0      |
| G3 | XMV17 ?   | XMV  | 5  | 23212035  | 23212626  | S | 3147 | C | 0  | 0 | 0 | 0  | P | tgggggtctgtccggat   | 0      |
| G3 | XMV42 43? | XMV  | 1  | 172778230 | 172786635 | P | 3099 | C | 0  | 0 | 0 | 0  | P | tgggggtctgtccggat   | 0      |
| G3 | <eco>     | EMV  | 8  | 126320498 | 126311126 | S | 2984 | C | 0  | 0 | 0 | 0  | P | tgggggtctgtccggat   | 0      |
